# Supplementary material for: FermentedAngelica sinensisactivates Nrf2 signaling and modulates the gut microbiota composition and metabolism to attenuated-gal induced liver aging
Source: Royal Society of Chemistry journal article supplement (doi:10.1039/d2fo01637k), 2022-11-30
Supplement: d2fo01637k1.pdf [file d2fo01637k1.pdf]

Electronic Supplementary Material (ESI) for Food & Function.

This journal is © The Royal Society of Chemistry 2022

Supplementary Table 1: 16S rRNA sequencing sequence of LZU-S-ZCJ strain

---

LZU-S-ZCJ

---

TTAGGCGCTGGTTCTAAAGGTTACCCACCGACTTTGGGTGTTACAACTCTCATGGTGTGA  
CGGGCGGTGTGTACAAGGCCCGGAACGTATTCACCGCGGCATGCTGATCCGCGATTACTA  
GCGATTCCGACTTCATGTAGGCGAGTTGCAGCCTACAATCCGAACTGAGAATGGCTTTAAG  
AGATTAGCTTACTCTCGCGAGTTCGCAACTCGTTGTACCATCCATTGTAGCACGTGTGTAGC  
CCAGGTCATAAGGGGCATGATGATTTGACGTCATCCCCACCTTCCTCCGTTTTGTCACCGGC  
AGTCTCACCAGAGTGCCCAACTTAATGCTGGCAACTGATAATAAGGGTTGCGCTCGTTGCG  
GGACTTAACCCAACATCTCACGACACGAGCTGACGACAACCATGCACCACCTGTATCCATGT  
CCCCGAAGGGAACGTCTAATCTCTTAGATTTGCATAGTATGTCAAGACCTGGTAAGGTTCTT  
CGCGTAGCTTCGAATTAACCACATGCTCCACCGCTTGTGCGGGCCCCCGTCAATTCCTTTG  
AGTTTCAGCCTTGCGGCCGTA TCTCCCCAGGCGGAATGCTTAATGCGTTAGCTGCAGCACTGA  
AGGGCGGAAACCTCCAACACTTAGCATTTCATCGTTTACGGTATGGACTACCAGGGTATCTA  
ATCCTGTTTGCTACCCATACTTTGAGCCTCAGCGTCAGTTACAGACCAGACAGCCGCCTTC  
GCCACTGGTGTTCTTCATATATCTACGCATTTACCGCTACACATGGAGTTCCACTGTCCTC  
TTCTGCACTCAAGTTTCCAGTTTCCGATGCACTTCTTCGGTTGAGCCGAAGGCTTTCACATC  
AGACTTAAAAAACC GCCTGCGCTCGCTTACGCCAATAAATCCGGACAACGCTTGCCACCT  
ACGTATTACCGCGGCTGCTGGCACGTAGTTAGCCGTGGCTTTCTGGTTAAATACCGTCAATA  
CCTGAACAGT TACTCTCAGATATGTTCTTCTTAAACAACAGAGTTTTACGAGCCGAAACCTT  
CTTCACTCACGCGGCGTTGCTCCATCAGACTTTCGTCCATTGTGGAAGATTCCCTACTGCTGC  
CTCCCGTAGGAGTTTGGGCCGTGTCTCAGTCCCAATGTGGCCGATTACCCTCTCAGGTCGGC  
TACGTATCATTGCCATGGTGAGCCGTTACCTCACCATCTAGCTAATACGCCGCGGGACCATC  
CAAAAGTGATAGCCGAAGCCATCTTCAAACCTCGGACCATGCGGTCCAAGTTGTTATGCGGT  
ATTAGCATCTGTTTCCAGGTGTTATCCCCCGCTTCTGGGCAGGTTTCCACGTGTTACTCACC  
AGTTCGCCACTCACTCAAATGTAAATCATGATGCAAGCACAATCAATACCAGAGTTCGTGCG  
ACTG

---

Supplementary Table 2: 16S rRNA sequencing sequence of LZU-J-TSL6 strain

---

LZU-J-TSL6

---

ATCTGTATCTTAGGCGGCTGGTTCCTAAAAGGTTACCCACCGACTTTGGGTGTTACAACT  
CTCATGGTGTGACGGCGGTGTGTACAAGGCCCGGAACGTATTCACCGCGGCATGCTGAT  
CCGCGATTACTAGCGATTCCGACTTCATGTAGGCGAGTTGCAGCCTACAATCCGAACTGAGA  
ATGGCTTTAAGAGATTAGCTTACTCTCGCGAGTTCGCAACTCGTTGTACCATCCATTGTAGC  
ACGTGTGTAGCCCAGGTCATAAGGGGCATGATGATTTGACGTCATCCCCACCTTCCTCCGGT  
TTGTCACCGGCAGTCTCACCAGAGTGCCCAACTTAATGCTGGCAACTGATAATAAGGGTTGC  
GCTCGTTGCGGGACTTAACCCAACATCTCACGACACGAGCTGACGACAACCATGCACCACCT  
GTATCCATGTCCCCGAAGGGAACGTCTAATCTCTTAGATTTGCATAGTATGTCAAGACCTGG  
TAAGTTCTTCGCGTAGCTTCGAATTAACCACATGCTCCACCGCTTGTGCGGGCCCCCGTC  
AATTCCTTTGAGTTT CAGCCTT GCGGCCGTA TCTCCCCAGGCGGAATGCTTAATGCGTTAGCT  
GCAGCACTGAAGGGCGGAAACCTCCAACACTTAGCATTTCATCGTTTACGGTATGGACTACC  
AGGGTATCTAATCCTGTTTGCTACCCATACTTTGAGCCTCAGCGTCAGTTACAGACCAGAC

---

AGCCGCCTTCGCCACTGGTGTCTTCCATATATCTACGCATTTACCCGCTACACATGGAGTTC  
 CACTGTCCTCTTCTGCACTCAAGTTTCCCAGTTTCCGATGCACTTCTTCGGTTGAGCCGAAGG  
 CTTTCACATCAGACTTAAAAAACCGCCTGCGCTCGCTTACGCCCAATAAATCCGGACAACG  
 CTTGCCACCTACGTATTACCGCGGCTGCTGGCAGTAGTTAGCCGTGGCTTTCTGGTTA

Supplementary Table 3: Primers for detection of relative abundance of Nrf2 signaling genes

| Gene Name | Forward Primer          | Reverse Primer                |
|-----------|-------------------------|-------------------------------|
| Nrf2      | TAGATGACCATGAGTTCGCTTGC | CCTGTACCTCGTTCAAACCG          |
| HO-1      | GATAGAGCGCAACAAGCAGAA   | GAAGACCATACCCGGAGTGAC         |
| NQO1      | GCGAGAAGAGCCCTGATTGT    | AGATGACTCGGAAGGATACTGAA<br>A  |
| GCLC      | CATCCTCCAGTTCCTGCACATC  | CATCGCCTCCATTAGTAACAAC        |
| GCLM      | TTCGCCTCCGATTGAAGATG    | TGGTTACTATTGGGTTTTACCTGT<br>G |
| GSS       | TATTTGACCAGCGTGCCGTAG   | AGACCCACCCTGCTCAGTTC          |
| GAPDH     | CCTCGTCCCGTAGACAAAATG   | TGAGGTCAATGAAGGGGTCGT         |
| ACTB      | GTGCTATGTTGCTCTAGACTTCG | CCATACCTTAGGACACCGTA          |

Supplementary Table 4: Compounds with increased content FAS vs. NFAS

| name                             | Formula       | rtmed    | MeanFAS     | MeanNFAS    | POS | NEG |
|----------------------------------|---------------|----------|-------------|-------------|-----|-----|
| Neoline                          | C24H39NO6     | 524.599  | 0.001586578 | 0.001306032 | Y   | N   |
| Racanisodamine                   | C17H23NO4     | 519.6525 | 0.001785591 | 0.001434867 | Y   | N   |
| Tazettine                        | C18H21NO5     | 428.1515 | 0.001431508 | 0.001132922 | Y   | N   |
| Raloxifene                       | C28H27NO4S    | 153.7795 | 0.025033829 | 0.014109237 | Y   | N   |
| 3-Formylindole                   | C9H7NO        | 383.124  | 0.020267421 | 0.016297906 | Y   | N   |
| Quinoline                        | C9H7N         | 240.298  | 0.005117532 | 0.003597204 | Y   | N   |
| Monocrotaline                    | C16H23NO6     | 278.7635 | 0.028128518 | 0.019784007 | Y   | N   |
| Dehydrocorydaline                | C22H24NO4+    | 457.396  | 0.00161241  | 0.000887804 | Y   | N   |
| retronecine                      | C8H13NO2      | 180.281  | 0.020322957 | 0.014926718 | Y   | N   |
| Harmene                          | C12H10N2      | 321.452  | 0.004033969 | 0.002442923 | Y   | N   |
| Demethylcoclaurine hydrochloride | C16H17NO3.HCl | 489.131  | 0.003974182 | 0.002632527 | Y   | N   |
| Nonivamide                       | C17H27NO3     | 481.328  | 0.00143364  | 0.000832406 | Y   | N   |
| Gelsevirine                      | C21H24N2O3    | 178.627  | 0.0210522   | 0.014545008 | Y   | N   |
| Norharman                        | C11H8N2       | 281.583  | 0.061463027 | 0.037605108 | Y   | N   |
| Iso-gamma-fagarine               | C13H11NO3     | 228.1355 | 0.003973703 | 0.00162455  | Y   | N   |
| Dihydrocapsaicin                 | C18H29NO3     | 500.1465 | 0.004736244 | 0.002864603 | Y   | N   |
| Norisoboldine                    | C18H19NO4     | 521.699  | 0.023686195 | 0.017931705 | Y   | N   |
| Desoxypeganine                   | C11H12N2      | 287.56   | 0.003740277 | 0.001331381 | Y   | N   |
| Tabersonine                      | C21H24N2O2    | 232.95   | 0.007605873 | 0.005085537 | Y   | N   |
| Vincadifformine                  | C21H26N2O2    | 221.653  | 0.003700382 | 0.001086451 | Y   | N   |
| 3-Furfuryl 2-                    | C10H9NO3      | 321.4175 | 0.008800031 | 0.006078299 | Y   | N   |

|                                               |             |          |             |             |   |   |  |
|-----------------------------------------------|-------------|----------|-------------|-------------|---|---|--|
| pyrrolicarboxylate                            |             |          |             |             |   |   |  |
| Adenosine<br>monophosphate                    | C10H14N5O7P | 51.70105 | 0.376414213 | 0.199168589 | N | Y |  |
| L-5-Hydroxytryptophan                         | C11H12N2O3  | 100.692  | 0.256391894 | 0.045994531 | N | Y |  |
| Malonic acid                                  | C3H4O4      | 42.8666  | 0.179504561 | 0.098370449 | N | Y |  |
| 3-(4-<br>HYDROXYPHENYL)LACTATE                | C9H10O4     | 164.302  | 3.070350665 | 0.055495787 | N | Y |  |
| Threonic acid                                 | C4H8O5      | 38.41065 | 0.361281961 | 0.200053534 | N | Y |  |
| Propylparaben                                 | C10H12O3    | 447.081  | 1.405906251 | 0.595578511 | N | Y |  |
| Acetylvanillin                                | C10H10O4    | 150.0745 | 0.005802463 | 0.003981545 | Y | N |  |
| Vanillin                                      | C8H8O3      | 301.48   | 0.078039101 | 0.063158528 | Y | N |  |
| Polydatin                                     | C20H22O8    | 462.186  | 0.003646071 | 0.002874357 | Y | N |  |
| Rhaponticin                                   | C21H24O9    | 301.49   | 0.001941102 | 0.001528167 | Y | N |  |
| Ethylparaben                                  | C9H10O3     | 344.166  | 0.002236194 | 0.001240138 | Y | N |  |
| 2-Hydroxyacetophenone                         | C8H8O2      | 336.437  | 0.016477408 | 0.005411064 | Y | N |  |
| CATECHOL                                      | C6H6O2      | 185.064  | 0.097836841 | 0.033847088 | N | Y |  |
| 3',5'-Dimethoxy-4'-<br>hydroxyacetophenone    | C10H12O4    | 278.806  | 0.12061657  | 0.04965479  | N | Y |  |
| Protosappanin B                               | C16H16O6    | 268.483  | 0.017017566 | 0.001498863 | Y | N |  |
| Phenol                                        | C18H22O5    | 566.333  | 0.007387775 | 0.004891422 | Y | N |  |
| Vanillic acid (not validated)                 | C9H10O4     | 394.4575 | 0.013579015 | 0.003522954 | Y | N |  |
| Zearalenone                                   | C18H22O5    | 545.3145 | 0.004405494 | 0.002620939 | Y | N |  |
| Methyl gallate                                | C8H8O5      | 111.901  | 0.102821146 | 0.021280469 | Y | N |  |
| Licoflavone A                                 | C20H18O4    | 326.3415 | 0.004179013 | 0.003425839 | Y | N |  |
| Taxifolin                                     | C15H12O7    | 74.4497  | 0.068407263 | 0.020608685 | N | Y |  |
| Trehalose                                     | C12H22O11   | 109.976  | 0.00760583  | 0.005071375 | N | N |  |
| Feselol                                       | C24H30O4    | 161.622  | 0.003533082 | 0.002569968 | Y | N |  |
| Coumaric acid                                 | C9H8O3      | 394.867  | 0.068290107 | 0.049234723 | Y | N |  |
| Isofraxidin                                   | C11H10O5    | 360.459  | 0.08024157  | 0.068129832 | Y | N |  |
| Schizandrin                                   | C24H32O7    | 524.9875 | 0.002492788 | 0.001585027 | Y | N |  |
| 6,7,8-trimethoxychromen-<br>2-one             | C12H12O5    | 472.746  | 0.027673052 | 0.020141084 | Y | N |  |
| Ethyl 4-methoxycinnamate                      | C12H14O3    | 1168.145 | 0.00214101  | 0.000301875 | Y | N |  |
| Arctigenin                                    | C21H24O6    | 582.943  | 0.002191052 | 0.001829768 | Y | N |  |
| Caffeic acid                                  | C9H8O4      | 238.856  | 0.01939551  | 0.014766196 | N | Y |  |
| Ethyl ferulate                                | C12H14O4    | 376.6435 | 0.229858621 | 0.13046705  | N | Y |  |
| DIMETHYLCAFFEIC ACID                          | C11H12O4    | 451.618  | 0.541439289 | 0.356154627 | N | Y |  |
| Curcumol                                      | C15H24O2    | 575.88   | 0.001449024 | 0.000298836 | Y | N |  |
| Deoxynivalenol                                | C15H20O6    | 414.891  | 0.002113195 | 0.001545405 | Y | N |  |
| Pseudolaric acid C                            | C21H26O7    | 544.8265 | 0.001579513 | 0.00075873  | Y | N |  |
| KOBUSONE                                      | C14H22O2    | 290.725  | 0.015096926 | 0.000195151 | Y | N |  |
| 3,19-Dihydroxyurs-12-ene-<br>23,28-dioic acid | C30H46O6    | 1168.145 | 0.009799754 | 0.001422715 | Y | N |  |

|                                                                                                                                                                                                                      |            |          |             |             |   |   |
|----------------------------------------------------------------------------------------------------------------------------------------------------------------------------------------------------------------------|------------|----------|-------------|-------------|---|---|
| cynaropicrin                                                                                                                                                                                                         | C19H22O6   | 523.6115 | 0.012137178 | 0.008226168 | Y | N |
| Shanzhiside methyl ester                                                                                                                                                                                             | C17H26O11  | 544.793  | 0.007095601 | 0.004047407 | Y | N |
| reynosin                                                                                                                                                                                                             | C15H20O3   | 290.1955 | 0.006183232 | 0.004223286 | Y | N |
| 7-hydroxy-1,4a-dimethyl-9-oxo-7-propan-2-yl-2,3,4,4b,5,6,10,10a-octahydrophenanthrene-1-carboxylic acid                                                                                                              | C20H30O4   | 383.179  | 0.006951633 | 0.003448008 | Y | N |
| Camphor                                                                                                                                                                                                              | C10H16O    | 367.2455 | 0.008594234 | 0.006458378 | Y | N |
| Dendrobine                                                                                                                                                                                                           | C16H25NO2  | 396.363  | 0.002134232 | 0.001486225 | Y | N |
| Pechueloic Acid                                                                                                                                                                                                      | C15H20O3   | 537.815  | 0.00182203  | 0.001413615 | Y | N |
| Nardosinone                                                                                                                                                                                                          | C15H22O3   | 600.6285 | 0.020234708 | 0.01548458  | Y | N |
| Tauroursodeoxycholic acid (1R,2R,5S,8R,14R,15R,16S)-16-hydroxy-1,2,14,17,17-pentamethyl-8-(prop-1-en-2-yl)pentacyclo[11.7.0.0 <sup>2,10</sup> .0 <sup>5,9</sup> .0 <sup>14,18</sup> ]jicosane-5,15-dicarboxylic acid | C30H46O5   | 1123.925 | 0.002178287 | 0.000328504 | Y | N |
| Glabrolide                                                                                                                                                                                                           | C30H44O4   | 1124.19  | 0.001603491 | 0.000225799 | Y | N |
| Quillaic acid                                                                                                                                                                                                        | C30H46O5   | 1123.95  | 0.002909421 | 0.000401621 | Y | N |
| Hydroxyvalerenic Acid (2S,6R,8aS)-6-(2-hydroxypropan-2-yl)-8a-methyl-4-methylidene-1,2,3,4a,5,6,7,8-octahydronaphthalen-2-ol                                                                                         | C15H26O2   | 367.61   | 0.003469868 | 0.002319095 | Y | N |
| Ailanthone                                                                                                                                                                                                           | C20H24O7   | 427.05   | 0.001542103 | 0.000885754 | Y | N |
| Pyroglutamic acid (not validated, isomer of 88)                                                                                                                                                                      | C5H7NO3    | 53.36585 | 1.140802718 | 0.55071441  | Y | N |
| Kynurenine                                                                                                                                                                                                           | C10H12N2O3 | 92.51675 | 0.013746207 | 0.00531436  | Y | N |

Supplementary Table 5: Compounds with decreased content FAS vs. NFAS

| name                           | Formula       | rtmed    | MeanFAS     | MeanNFAS    | POS | NEG |
|--------------------------------|---------------|----------|-------------|-------------|-----|-----|
| 1-methoxyindole-3-carbaldehyde | C10H9NO2      | 203.727  | 0.009462824 | 0.012264719 | Y   | N   |
| Benzamide                      | C7H7NO        | 75.8801  | 0.003474613 | 0.005626082 | Y   | N   |
| ROSIGLITAZONE HCl              | C18H20ClN3O3S | 472.28   | 0.005839957 | 0.008344828 | Y   | N   |
| Stepharine                     | C18H19NO3     | 618.891  | 0.000491203 | 0.001048078 | Y   | N   |
| L-Anserine nitrate salt        | C10H16N4O3    | 40.4696  | 0.003553977 | 0.012073392 | Y   | N   |
| Rutaecarpine                   | C18H13N3O     | 60.3029  | 0.00334058  | 0.013677783 | Y   | N   |
| Micheliolide                   | C15H20O3      | 712.5155 | 0.000409476 | 0.000873652 | Y   | N   |

|                                                                              |               |          |             |             |   |   |
|------------------------------------------------------------------------------|---------------|----------|-------------|-------------|---|---|
| Haplophyllidine                                                              | C18H23NO4     | 70.7897  | 0.00000172  | 0.005961409 | Y | N |
| Tubotaiwine                                                                  | C20H24N2O2    | 247.776  | 0.00000172  | 0.003625349 | Y | N |
| Acetylcorynoline                                                             | C23H23NO6     | 142.64   | 0.002513261 | 0.003834171 | Y | N |
| (2E,4E)-5-(1,3-benzodioxol-5-yl)-N-(2-methylpropyl)penta-2,4-dienamide       | C16H19NO3     | 636.3835 | 0.003859671 | 0.006370889 | Y | N |
| Guanosine                                                                    | C10H13N5O5    | 55.0983  | 0.052172038 | 0.527980933 | Y | N |
| Uridine                                                                      | C9H12N2O6     | 43.2779  | 0.073593753 | 0.238458647 | N | Y |
| trans-Zeatin-riboside                                                        | C15H21N5O5    | 222.245  | 0.00019704  | 0.00346457  | N | Y |
| Isoguanosine                                                                 | C10H13N5O5    | 55.4166  | 0.046526946 | 2.027476505 | N | Y |
| Nicotinic acid                                                               | C6H5NO2       | 279.0315 | 0.058998487 | 0.060003022 | N | Y |
| 12-oxo-phytodienoic acid                                                     | C18H28O3      | 662.01   | 0.002677284 | 0.007864441 | Y | N |
| loganic acid                                                                 | C16H24O10     | 279.689  | 0.00000172  | 0.025914391 | Y | N |
| gamma-Linolenic acid                                                         | C18H30O2      | 701.4005 | 0.002468712 | 0.004371431 | Y | N |
| MALEIC ACID                                                                  | C4H4O4        | 43.07225 | 0.073355023 | 2.109338287 | N | Y |
| DiffRACTic acid                                                              | C20H22O7      | 366.185  | 0.027062022 | 0.041521603 | N | Y |
| Hinokitiol                                                                   | C10H12O2      | 307.13   | 0.002936361 | 0.005311342 | Y | N |
| (6R)-4-Methoxy-6-[(E)-2-phenylvinyl]-5,6-dihydro-2H-pyran-2-one              | C14H14O3      | 490.233  | 0.001427869 | 0.003343432 | Y | N |
| Combretastatin A4 disodium phosphate                                         | C18H19O8P.2Na | 596.944  | 0.000729473 | 0.003164574 | Y | N |
| Piceatannol                                                                  | C14H12O4      | 577.907  | 0.003733757 | 0.007638814 | N | Y |
| Flavanone base +2O, 1MeO                                                     | C16H14O5      | 491.871  | 0.000720804 | 0.001130476 | Y | N |
| 5-O-Demethylnobiletin                                                        | C20H20O8      | 510.5205 | 0.003240138 | 0.008347633 | Y | N |
| Flavanone                                                                    | C15H12O2      | 612.0045 | 0.002026581 | 0.003398592 | Y | N |
| Flavokawain A                                                                | C18H18O5      | 672.113  | 0.002344129 | 0.003609625 | Y | N |
| 7-Hydroxy-4'-methoxyflavone                                                  | C16H12O4      | 507.4065 | 0.004867904 | 0.009513075 | N | Y |
| Rutin                                                                        | C27H30O16     | 354.9415 | 0.002364348 | 0.002759073 | Y | N |
| (2R,3R)-3,5-dihydroxy-2-(4-hydroxyphenyl)-7-methoxy-2,3-dihydrochromen-4-one | C16H14O6      | 479.476  | 0.013137557 | 0.028752702 | N | Y |
| Iristectorigenin B                                                           | C17H14O7      | 438.576  | 0.012261037 | 0.024008149 | N | Y |
| L-Asarinin                                                                   | C20H18O6      | 532.93   | 0.000855457 | 0.002116603 | Y | N |
| p-Coumaric acid                                                              | C9H8O3        | 53.78905 | 0.013325325 | 0.019284314 | Y | N |
| 7-Dehydroxy-4-demethylpodophyllotoxin                                        | C21H20O7      | 537.7895 | 0.001172503 | 0.002018935 | Y | N |
| 4-Methyl-6,7-dihydroxycoumarin                                               | C10H8O4       | 442.957  | 0.001728081 | 0.002878361 | Y | N |

|                                                                                                                                      |           |          |             |             |   |   |
|--------------------------------------------------------------------------------------------------------------------------------------|-----------|----------|-------------|-------------|---|---|
| Cinnamic acid                                                                                                                        | C9H8O2    | 729.274  | 0.00000172  | 0.004745612 | Y | N |
| (9-hydroxy-8,8-dimethyl-2-oxo-9,10-dihydropyrano[2,3-f]chromen-10-yl) (Z)-2-methylbut-2-enoate                                       | C19H20O6  | 660.2535 | 0.003787321 | 0.006948418 | Y | N |
| Coniferyl aldehyde                                                                                                                   | C10H10O3  | 393.741  | 0.00974279  | 0.023113564 | Y | N |
| Ferulic acid                                                                                                                         | C10H10O4  | 192.515  | 0.044151688 | 0.051243751 | Y | N |
| Fraxin                                                                                                                               | C16H18O10 | 248.6105 | 0.003554859 | 0.004495442 | Y | N |
| coniferin                                                                                                                            | C16H22O8  | 328.6995 | 0.420208933 | 0.567635379 | N | Y |
| columbianetin                                                                                                                        | C14H14O4  | 559.404  | 0.069170425 | 0.093671914 | N | Y |
| Wikstromol                                                                                                                           | C20H22O7  | 530.21   | 0.066116788 | 0.118234438 | N | Y |
| 5-[6-(3-hydroxy-4-methoxyphenyl)-1,3,3a,4,6,6a-hexahydrofuro[3,4-c]furan-3-yl]-2-methoxyphenol                                       | C20H22O6  | 625.8335 | 0.04121861  | 0.068826995 | N | Y |
| trans-4-Coumaric acid                                                                                                                | C9H8O3    | 315.245  | 0.025595167 | 0.50299409  | N | Y |
| sweroside                                                                                                                            | C16H22O9  | 232.4555 | 0.009002392 | 0.011890281 | Y | N |
| [(1R,3aR,5R,5aR,8aR,9aR)-1,5,8a-trimethyl-2,8-dioxo-3a,4,5,5a,9,9a-hexahydro-1H-azuleno[6,5-b]furan-9-yl] acetate                    | C17H22O5  | 665.0785 | 0.007463551 | 0.009104265 | Y | N |
| Obacunone                                                                                                                            | C26H30O7  | 575.965  | 0.020485251 | 0.025938691 | Y | N |
| Linderalactone                                                                                                                       | C15H16O3  | 624.284  | 0.003331763 | 0.004063932 | Y | N |
| Ginkgolide K                                                                                                                         | C20H22O9  | 298.748  | 0.001715824 | 0.003469484 | Y | N |
| Cantharidin                                                                                                                          | C10H12O4  | 222.476  | 0.002870417 | 0.003369385 | Y | N |
| Levistilide A                                                                                                                        | C24H28O4  | 760.4765 | 0.002694216 | 0.005468379 | Y | N |
| (1R,2R,4S,7R,8S,12R)-7-(furan-3-yl)-1,8,12,17,17-pentamethyl-3,6,16-trioxapentacyclo[9.9.02,4.02,8.012,18]icos-13-ene-5,15,20-trione | C26H30O7  | 711.583  | 0.000469773 | 0.001277933 | Y | N |
| Cryptotanshinone                                                                                                                     | C19H20O3  | 729.6605 | 0.000236277 | 0.001332392 | Y | N |
| Columbin                                                                                                                             | C20H22O6  | 615.024  | 0.001646087 | 0.002956387 | Y | N |
| Deoxyandrographolide                                                                                                                 | C20H30O4  | 709.31   | 0.00142067  | 0.00235429  | Y | N |
| Ursolic acid                                                                                                                         | C30H48O3  | 640.355  | 0.000531784 | 0.001723569 | Y | N |
| 1,4a-dimethyl-9-oxo-7-propan-2-yl-3,4,10,10a-tetrahydro-2H-phenanthrene-1-carboxylic                                                 | C20H26O3  | 257.417  | 0.000143047 | 0.002413729 | Y | N |

| acid              |           |          |             |             |   |   |
|-------------------|-----------|----------|-------------|-------------|---|---|
| Lindenenol        | C15H18O2  | 712.5155 | 0.000789569 | 0.002406192 | Y | N |
| Ginsenoside Ro    | C48H76O19 | 640.4975 | 0.021662722 | 0.068307443 | N | Y |
| Arenobufagin      | C24H32O6  | 594.916  | 0.004972134 | 0.016695996 | N | Y |
| Gibberellin A4&A7 | C19H22O5  | 585.922  | 0.002476271 | 0.041279601 | N | Y |
| aucubin           | C15H22O9  | 226.0215 | 0.00382046  | 0.006035    | Y | N |
| Cinobufagin       | C26H34O6  | 542.654  | 0.000889549 | 0.002826073 | Y | N |
| D-ASPARTATE       | C4H7NO4   | 37.375   | 0.744578918 | 0.923191296 | N | Y |
| Arginine          | C6H14N4O2 | 99.892   | 0.513406414 | 0.622791867 | Y | N |
| L-Glutamic Acid   | C5H9NO4   | 41.6904  | 0.179368712 | 0.238583083 | Y | N |
| Aspartic acid     | C4H7NO4   | 41.67545 | 0.025572859 | 0.036774924 | Y | N |
| Tyrosine          | C9H11NO3  | 52.082   | 0.256553313 | 0.328146375 | Y | N |
| Homoserine        | C4H9NO3   | 41.1104  | 0.013992456 | 0.018074989 | Y | N |

Supplementary Table 6: Compounds of fecal metabolites

| name                                                          | BFAS/FAS | HMDB        | Class                                  |
|---------------------------------------------------------------|----------|-------------|----------------------------------------|
| Uric acid                                                     | ↓        | HMDB0000289 | Imidazopyrimidines                     |
| Ethyl tetradecanoate                                          | ↓        | HMDB0034153 | Fatty Acyls                            |
| (1R,2S,3R)-2-Acetyl-4(5)-(1,2,3,4-tetrahydroxybutyl)imidazole | ↓        | HMDB0029756 | Organooxygen compounds                 |
| myo-Inositol                                                  | ↓        | HMDB0000211 | Organooxygen compounds                 |
| LysoPA(18:1(9Z)/0:0)                                          | ↓        | HMDB0007855 | Glycerophospholipids                   |
| LysoPA(16:0/0:0)                                              | ↓        | HMDB0007853 | Glycerophospholipids                   |
| Nervonic acid                                                 | ↓        | HMDB0002368 | Fatty Acyls                            |
| Erucic acid                                                   | ↓        | HMDB0002068 | Fatty Acyls                            |
| Allose                                                        | ↓        | HMDB0001151 | Organooxygen compounds                 |
| Mesna                                                         | ↓        | HMDB0003745 | Organic sulfonic acids and derivatives |
| D-Glucurono-6,3-lactone                                       | ↓        | HMDB0006355 | Furofurans                             |
| Pelargonic acid                                               | ↑        | HMDB0000847 | Fatty Acyls                            |
| Saccharin                                                     | ↑        | HMDB0029723 | Benzothiazoles                         |
| Cyclamic acid                                                 | ↑        | HMDB0031340 | Sulfamic acid derivatives              |
| 3b-Hydroxy-5-cholenoic acid                                   | ↑        | HMDB0000308 | Steroids and steroid derivatives       |
| Xanthoxylin                                                   | ↑        | HMDB0029645 | Organooxygen compounds                 |

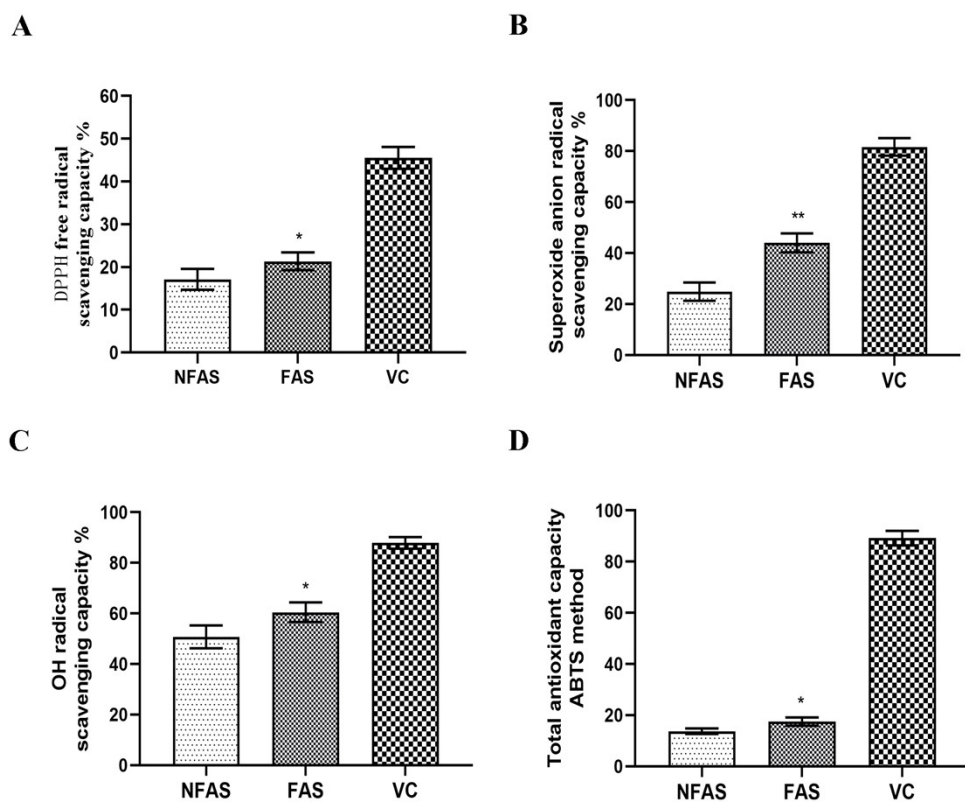

Supplementary Figure 1: The antioxidant activity of FAS/NFAS *in vitro*. (A) DPPH free radical scavenging rate, (B) Superoxide anion scavenging rate, (C) Hydroxyl radical scavenging rate, (D) Total antioxidant capacity (ABTS method). All data are expressed as mean  $\pm$  SD. \*  $p < 0.05$  and \*\*  $p < 0.01$ : significantly different compared with NFAS. (FAS: fermented Angelica Sinensis, NFAS: non-fermented Angelica Sinensis, VC: vitamin C)
